# Supplementary material
Source: ML conference proceedings conference paper supplement (https://proceedings.mlr.press/v80/chierichetti18a.html)
Supplement: Supplementary file 1 [file chierichetti18a-supp.pdf]

# Learning a Mixture of Two Multinomial Logits

## Supplementary Material

Flavio Chierichetti\*  
Sapienza University  
Rome, Italy  
flavio@di.uniroma1.it

Ravi Kumar  
Google  
Mountain View, CA  
ravi.k53@gmail.com

Andrew Tomkins  
Google  
Mountain View, CA  
atomkins@gmail.com

### A Approximate Oracles

In the main body of the paper, we have assumed to have access to the exact value of  $D^A(i)$ . We now discuss how Theorem 14 can be used to derive algorithmic results based on an oracle that, given a slate  $T$ , can generate samples according to  $D_T^A(\cdot)$ ; we call these *sample queries*. For simplicity, we will assume that all the (unknown) weights of the 2-MNL are positive integers in the range  $[M]$  for some  $M \geq 1$ .

Our first claim is that, under the above assumption on the weights range, there exists an inverse polynomial separation between the possible values of  $D_T^A(i)$ .

**Lemma A.1.** *Let  $a, a', b, b' : [n] \rightarrow [M]$  be weight functions and let  $\mathcal{A} = (a, b, \frac{1}{2})$  and  $\mathcal{A}' = (a', b', \frac{1}{2})$ . Then, for  $T \subseteq U, |T| = 2, 3$ , if  $i \in T$ , then either  $D_T^{\mathcal{A}}(i) = D_T^{\mathcal{A}'}(i)$  or  $|D_T^{\mathcal{A}}(i) - D_T^{\mathcal{A}'}(i)| \geq \frac{1}{162M^4}$ .*

*Proof.* Let  $A = \sum_{j \in T} a_j$ ,  $B = \sum_{j \in T} b_j$ ,  $A' = \sum_{j \in T} a'_j$  and  $B' = \sum_{j \in T} b'_j$ . Then,  $A, B, A', B' \leq 3M$ .

We then have,  $D_T^{\mathcal{A}}(i) = \frac{a(i)}{2A} + \frac{b(i)}{2B} = \frac{a(i)B + b(i)A}{2AB}$  and  $D_T^{\mathcal{A}'}(i) = \frac{a'(i)}{2A'} + \frac{b'(i)}{2B'} = \frac{a'(i)B' + b'(i)A'}{2A'B'}$ . Moreover,

$$D_T^{\mathcal{A}}(i) - D_T^{\mathcal{A}'}(i) = \frac{a(i)B + b(i)A}{2AB} - \frac{a'(i)B' + b'(i)A'}{2A'B'} = \frac{a(i)A'BB' + b(i)AA'B' - a'(i)ABB' - b'(i)AA'B}{2AA'BB'}.$$

Now, if  $D_T^{\mathcal{A}}(i) \neq D_T^{\mathcal{A}'}(i)$ , then the numerator  $a(i)A'BB' + b(i)AA'B' - a'(i)ABB' - b'(i)AA'B$  must be non-zero and since the numerator is obtained by adding, subtracting, and multiplying integers, it must evaluate to a non-zero integer. We then get  $|D_T^{\mathcal{A}}(i) - D_T^{\mathcal{A}'}(i)| = 1/(2AA'BB') \geq 1/(162M^4)$ .  $\square$

For a 2- or 3-slate  $T$  and for a large enough constant  $c > 0$ , using the sampling oracle  $O(cM^8 \ln(n/\delta))$  times, we can reconstruct a value  $\tilde{D}_T^{\mathcal{A}}(i)$  such that  $|\tilde{D}_T^{\mathcal{A}}(i) - D_T^{\mathcal{A}}(i)| \leq \frac{1}{325M^4}$ , with probability at least  $1 - O(\delta n^{-2})$ . By looping through the possible values of  $a$  and  $b$  on the

---

\*Work done in part while visiting Google. Supported in part by a Google Focused Research Award, by the ERC Starting Grant DMAP 680153, by the SIR Grant RBSI14Q743, and by the ‘‘Dipartimenti di Eccellenza 2018-2022’’ grant awarded to the Dipartimento di Informatica at Sapienza.

items of  $T$ , we can obtain  $D_T^A(i)$ , since by Lemma A.1, it will be the one value we can obtain that is within an additive distance of  $\frac{1}{325M^4}$  ( $< \frac{1}{2} \cdot \frac{1}{162M^4}$ ) from  $\tilde{D}_T^A(i)$ . Using the algorithms in Theorem 5 and Theorem 6, and a union bound, we obtain:

**Theorem A.2.** *Let  $a, b : [n] \rightarrow [M]$  be weight functions and let  $\mathcal{A} = (a, b, \frac{1}{2})$ . Then, for each small enough  $\delta > 0$ , with probability at least  $1 - O(\delta)$  we can reconstruct the weights  $a$  and  $b$  with  $O(M^8 n \ln(n/\delta))$  adaptive or  $O(M^8 n^2 \ln(n/\delta))$  non-adaptive sample queries to 2- and 3-slates.*

## B Lower Bounds for $k$ -MNL

A  $k$ -MNL is a mixture of  $k$  separate MNLs. Specifically, a  $k$ -MNL  $\mathcal{A}$  is given by a set  $\{a^{(1)}, \dots, a^{(k)}\}$  of weight functions and a mixing distribution  $\mu$  on  $[k]$ . Given a slate  $T \subseteq [n]$ , the mixture model first chooses an index  $\ell \in [k]$  according to  $\mu$  and then invokes the MNL  $a^{(\ell)}$ . As in 2-MNL, we only focus on uniform mixing distributions, i.e.,  $\mu$  is uniform on  $[k]$ . As before, we use  $D_T^A(i)$  to denote the probability that the mixture model  $\mathcal{A}$  chooses  $i$ , given the slate  $T$ .

While large parts of our proof structure for  $k = 2$  generalizes to  $k > 2$ , there are significant technical challenges in extending our current methods to finding an algorithm for learning uniform  $k$ -MNLs. However, we can obtain some concrete slate and query lower bounds for learning uniform  $k$ -MNLs.

We first show some generalization of Theorem 2. Specifically, we show that  $(k + 1)$ -slate queries are necessary to learn a uniform  $k$ -MNL by showing that there are instances of 1-MNL and  $k$ -MNL that are indistinguishable to any algorithm that uses only  $k$ -slate queries.

**Theorem B.1.** *Let  $k \geq 2$  be given, and let  $p(T, i) = 1/|T|$  for each  $i \in T \subseteq [k]$ . Then, there is a 1-MNL  $\mathcal{A}$  and an infinite family of uniform  $k$ -MNLs  $\{\mathcal{A}^{(x)}\}$  such that  $D_T^{\mathcal{A}^{(x)}}(i) = p(T, i)$ .*

*Proof.* Note that the definition of  $p(T, i)$  says that each item in a slate (of size at most  $k$ ) has the same chance of winning. Then trivially the 1-MNL with the constant weight function  $a$  satisfies  $D_T^a(i) = 1/|T|$ .

For each real number  $x \in (0, 1)$ , we will construct a uniform  $k$ -MNL  $\mathcal{A}^{(x)}$  such that  $D_T^{\mathcal{A}^{(x)}}(i) = 1/|T|$ . For  $i \in [k]$ , let

$$a_j^{(i,x)} = \begin{cases} x & \text{if } j = i, \\ \frac{1-x}{k-1} & \text{if } j \in [k] \setminus \{i\}, \end{cases}$$

and  $\mathcal{A}^{(x)}$  is defined to choose uniformly across the weighting functions  $a^{(1,x)}, \dots, a^{(k,x)}$ .

Now, consider any  $k$ -slate  $T$  and consider any item  $i \in T$ . Observe that each MNL  $a^{(j,x)}$  in the mixture  $\mathcal{A}^{(x)}$  when  $j \notin T$ , gives uniform weight to the items in  $T$ . Thus, conditioning on the MNL being chosen from the set  $\{a^{(j,x)}\}_{j \notin T}$ , we have that the probability that  $i$  wins is exactly  $|T|^{-1}$ .

On the other hand, each MNL  $a^{(j,x)}$  in the mixture  $\mathcal{A}^{(x)}$  when  $j \in T$ , will give a total weight to the items of  $T$  equal to  $x + (|T| - 1) \cdot \frac{1-x}{k-1}$ . Moreover, if  $j \in T$ , then the MNL  $a^{(j,x)}$  will give to item  $i$  a weight of  $x$  if  $i = j$ , and a weight of  $\frac{1-x}{k-1}$  otherwise. Conditioning on the MNL to be chosen in the set  $\{a^{(j,x)}\}_{j \in T}$ , the probability of  $i$  winning is then

$$\frac{1}{|T|} \left( 1 \cdot \frac{x}{x + (|T| - 1) \cdot \frac{1-x}{k-1}} + (|T| - 1) \cdot \frac{\frac{1-x}{k-1}}{x + (|T| - 1) \cdot \frac{1-x}{k-1}} \right) = \frac{1}{|T|}.$$

Therefore, for each  $i$  in a  $k$ -slate  $T$ , it holds  $D_T^{\mathcal{A}^{(x)}}(i) = 1/|T|$ . □

Next, as in the 2-MNL case, we can show query lower bounds for adaptive and non-adaptive algorithms, generalizing Theorem 4.

**Theorem B.2.** *Any algorithm for  $k$ -MNL that queries using  $c$ -slates needs  $\Omega(n/c)$  queries to reconstruct the  $k$ -MNL; the query lower bound for non-adaptive algorithms is  $\Omega(n^2/c^2)$ .*

*Proof.* Let  $i, j$  be two distinct items in  $[n]$  chosen u.a.r. We will construct two different  $k$ -MNLs,  $\mathcal{A} = (a^{(1)}, \dots, a^{(k)})$  and  $\mathcal{B} = (b^{(1)}, \dots, b^{(k)})$ , as follows. Let each MNL give a uniform weight of 1 to each item except for  $i$  and  $j$ . In  $\mathcal{A}$  and  $\mathcal{B}$ , let each MNL but the first two give a weight 1 to each of the items  $i$  and  $j$ . For  $\mathcal{A}$ , let  $a_i^{(1)} = a_j^{(1)} = 2$  and  $a_i^{(2)} = a_j^{(2)} = 1$ . For  $\mathcal{B}$ , let  $b_i^{(1)} = b_j^{(2)} = 2$  and  $b_j^{(1)} = b_i^{(2)} = 1$ .

If an algorithm performs no query containing both items  $i$  and  $j$ , then it cannot distinguish between  $\mathcal{A}$  and  $\mathcal{B}$ , and is therefore unable to learn the weights of the MNLs. Indeed, for any slate  $S \subseteq [n] \setminus \{i, j\}$ , we have that  $D_S^{\mathcal{A}} = D_S^{\mathcal{B}}$ ,  $D_{\{i\} \cup S}^{\mathcal{A}} = D_{\{i\} \cup S}^{\mathcal{B}}$ , and  $D_{\{j\} \cup S}^{\mathcal{A}} = D_{\{j\} \cup S}^{\mathcal{B}}$ .

Any algorithm performing queries to slates of size at most  $c$  will need to perform at least  $\Omega(n/c)$  queries to query at least once item  $i$  with constant probability. This proves the adaptive lower bound. In the non-adaptive case, observe that each query performed by the algorithm will cover at most  $\binom{c}{2}$  different pairs. Since we need the algorithm to query  $i$  and  $j$  together to distinguish between  $\mathcal{A}$  and  $\mathcal{B}$ , and since there are  $\binom{n}{2}$  many pairs of items, the algorithm will need to perform at least  $\Omega(n^2/c^2)$  to succeed with constant probability.  $\square$

We now show a strong lower bound for reconstructing the winning probabilities.

**Theorem B.3.** *For each  $k \geq 1$ , with non-adaptive queries to  $O(k)$ -slates, the number of queries needed to learn the winning probabilities of a  $2^k$ -MNL on a ground set of  $n$  items is  $\Omega(n^{k+1})$ .*

*Proof.* Fix  $k \geq 1$ , let  $K = 2^k$ , let the number of items  $n$  satisfy  $n \geq K + 1$ . Choose  $K + 1$  items uniformly at random, say the ones having indices  $1 \leq i_1 < \dots < i_{k+1} \leq n$ . Moreover, choose a uniform at random bit  $b \in \{0, 1\}$ .

The random  $K$ -MNL is constructed as follows. For each  $i \in [n] \setminus \{i_1, \dots, i_{k+1}\}$ , each MNL will give weight 1 to  $i$ . Moreover, for  $0 \leq t \leq K - 1$ ,

- the  $(t + 1)$ -st MNL will assign a weight of 2 (resp., 1) to item  $i_j$  if the  $j$ th bit of  $t$  is 1 (resp., 0), for each  $1 \leq j \leq k$  and,
- the  $(t + 1)$ -st MNL will assign a weight of 2 (resp., 1) to item  $i_{k+1}$  if the parity of  $b$  equals (resp., does not equal) the parity of the weight of the binary representation of  $t$ .

The  $K$ -MNL will choose uniformly at random among its  $K$  MNLs.

Now, observe that for any sequence of  $k$  indices out of  $\{i_1, \dots, i_{k+1}\}$ , regardless of  $b$ , the projection of the  $2^k$  MNLs on those  $k$  indices will be composed of exactly all the  $2^k$  binary words of length  $k$ . Therefore, for each slate  $S$  of cardinality at most  $k + 1$ , the winning probabilities of  $S$  will be uniform regardless of  $b$ .

On the other hand, any slate containing the items  $i_1, \dots, i_{k+1}$  plus any other item, will have different winning probabilities in the two  $K$ -MNLs.

It follows that if one does not look at a slate containing all the items  $\{i_1, \dots, i_{k+1}\}$  plus any other item, one cannot learn the unknown  $K$ -MNL.

Since the indices  $i_1, \dots, i_{k+1}$  are chosen u.a.r., in a non-adaptive environment, one has to look at at least  $\Omega(n^{k+1}) = \Omega(n^{1+\lg K})$  slates before being able to reconstruct the  $K$ -MNL (and/or its winning probabilities).  $\square$

## C Proofs

### C.1 Proof of Lemma 8

*Proof.* We first write a chain of predicates equivalent to  $P_{x,z}$ :

$$\begin{aligned}
D_{\{x,z\}}(x) \cdot D_{\{x,y,z\}}(z) - D_{\{x,z\}}(z) \cdot D_{\{x,y,z\}}(x) &\geq 0 \iff \\
\left( \frac{a_x}{1-a_y} + \frac{b_x}{1-b_y} \right) (a_z + b_z) - \left( \frac{a_z}{1-a_y} + \frac{b_z}{1-b_y} \right) (a_x + b_x) &\geq 0 \iff \\
\frac{a_x(a_z + b_z)}{1-a_y} + \frac{b_x(a_z + b_z)}{1-b_y} - \frac{a_z(a_x + b_x)}{1-a_y} - \frac{b_z(a_x + b_x)}{1-b_y} &\geq 0 \iff \\
\frac{a_x b_z - a_z b_x}{1-a_y} + \frac{b_x a_z - b_z a_x}{1-b_y} &\geq 0 \iff \\
(a_x b_z - b_x a_z) \cdot \left( \frac{1}{1-a_y} - \frac{1}{1-b_y} \right) &\geq 0 \iff \\
(a_x b_z - b_x a_z) \cdot ((1-b_y) - (1-a_y)) &\geq 0 \iff \\
(a_x b_z - b_x a_z) \cdot (a_y - b_y) &\geq 0,
\end{aligned}$$

thus  $P_{x,z} \iff (a_x b_z - b_x a_z)(a_y - b_y) \geq 0$  and by symmetry  $P_{y,z} \iff (a_y b_z - b_y a_z)(a_x - b_x) \geq 0$ .

Now, we prove that  $P_{x,z} \wedge P_{y,z} \implies (a_x - b_x) \cdot (a_y - b_y) \geq 0$ . By contradiction,

- $a_x > b_x$  and  $a_y < b_y \implies b_z < a_z$  for  $P_{x,z}$  to hold and  $b_z > a_z$  for  $P_{y,z}$  to hold; and
- $a_x < b_x$  and  $a_y > b_y \implies b_z > a_z$  for  $P_{x,z}$  to hold and  $b_z < a_z$  for  $P_{y,z}$  to hold.

Then, if  $P_{x,z} \wedge P_{y,z}$ , either  $a_x > b_x$  and  $a_y > b_y$ , or  $a_x < b_x$  and  $a_y < b_y$ , or  $a_x = b_x$ , or  $a_y = b_y$ . Equivalently,  $(a_x - b_x)(a_y - b_y) \geq 0$ .

Now, suppose that  $(a_x - b_x)(a_y - b_y) \geq 0$ . We consider two cases:

- if  $a_x - b_x \geq 0$  and  $a_y - b_y \geq 0$ , then  $a_z - b_z \leq 0$ , therefore both  $P_{x,z}$  and  $P_{y,z}$  hold;
- if  $a_x - b_x \leq 0$  and  $a_y - b_y \leq 0$ , then  $a_z - b_z \geq 0$ , therefore, again, both  $P_{x,z}$  and  $P_{y,z}$  hold.  $\square$

### C.2 Proof of Lemma 9

*Proof.* For simplicity, let  $Q_{x,y}$  denote  $P_{x,y} \wedge P_{y,x}$ . In a manner analogous to the proof of Lemma 8, we can prove that  $Q_{x,y} \iff [D_{\{x,y\}}(x) \cdot D_{\{x,y,z\}}(y) - D_{\{x,y\}}(y) \cdot D_{\{x,y,z\}}(x) = 0]$  and  $Q_{x,y} \iff [a_x b_y = b_x a_y \vee a_z = b_z]$ . Recall that  $P_{z,x} \iff [(a_z b_x - b_z a_x)(a_y - b_y) \geq 0]$  and  $P_{z,y} \iff [(a_z b_y - b_z a_y)(a_x - b_x) \geq 0]$ . We now prove the two implications.

(i) Suppose that  $Q_{x,y}, P_{z,x}, P_{y,x}$  hold but by contradiction,  $a_z \neq b_z$ . Then,  $a_x b_y = b_x a_y \stackrel{\Delta}{=} \gamma$ . Summing up the two inequalities induced by  $P_{z,x}$  and  $P_{y,x}$ , we get

$$\begin{aligned}
(a_z b_x - b_z a_x) \cdot (a_y - b_y) + (a_z b_y - b_z a_y) \cdot (a_x - b_x) &\geq 0 \iff \\
a_y a_z b_x - a_z b_x b_y - a_x a_y b_z + a_x b_y b_z + a_x a_z b_y - a_z b_x b_y - a_x a_y b_z + a_y b_x b_z &\geq 0 \iff \\
a_y b_x (a_z + b_z) + a_x b_y (a_z + b_z) - 2(a_z b_x b_y + a_x a_y b_z) &\geq 0 \iff \\
2\gamma(a_z + b_z) - 2(a_z b_x b_y + a_x a_y b_z) &\geq 0,
\end{aligned}$$

thus,

$$a_z + b_z \geq \frac{a_z b_x b_y}{\gamma} + \frac{a_x a_y b_z}{\gamma}. \quad (1)$$

Now, if we substitute  $a_x b_y$  for the first occurrence of  $\gamma$  and  $a_y b_x$  for the second in (1), we get

$$a_z + b_z \geq a_z \frac{b_x}{a_x} + b_z \frac{a_x}{b_x}, \quad (2)$$

while if we substitute  $a_y b_x$  for the first occurrence of  $\gamma$  and  $a_x b_y$  for the second in (1), we get

$$a_z + b_z \geq a_z \frac{b_y}{a_y} + b_z \frac{a_y}{b_y}. \quad (3)$$

We consider the following two cases.

- If  $a_z > b_z$ , then there must exist some  $w \in \{x, y\}$  such that  $b_w > a_w$  (since  $a_x + a_y + a_z = 1 = b_x + b_y + b_z$ ). By choosing the appropriate inequality among (2) and (3), we get

$$\begin{aligned} a_z + b_z &\geq a_z \frac{b_w}{a_w} + b_z \frac{a_w}{b_w} = \frac{a_w}{b_w} (a_z + b_z) + \left( \frac{b_w}{a_w} - \frac{a_w}{b_w} \right) a_z \\ &> \frac{a_w}{b_w} (a_z + b_z) + \left( \frac{b_w}{a_w} - \frac{a_w}{b_w} \right) \frac{a_z + b_z}{2} = \frac{1}{2} \left( \frac{b_w}{a_w} + \frac{a_w}{b_w} \right) (a_z + b_z). \end{aligned}$$

- If  $a_z < b_z$ , then there is some  $w \in \{x, y\}$  such that  $b_w < a_w$ . Again, choosing the appropriate inequality among (2) and (3), we get

$$\begin{aligned} a_z + b_z &\geq a_z \frac{b_w}{a_w} + b_z \frac{a_w}{b_w} = \frac{b_w}{a_w} (a_z + b_z) + \left( \frac{a_w}{b_w} - \frac{b_w}{a_w} \right) b_z \\ &> \frac{b_w}{a_w} (a_z + b_z) + \left( \frac{a_w}{b_w} - \frac{b_w}{a_w} \right) \frac{a_z + b_z}{2} = \frac{1}{2} \left( \frac{a_w}{b_w} + \frac{b_w}{a_w} \right) (a_z + b_z). \end{aligned}$$

Therefore, there is always some  $w \in \{x, y\}$  such that  $a_z + b_z > \frac{1}{2} \left( \frac{a_w}{b_w} + \frac{b_w}{a_w} \right) (a_z + b_z)$ . However, since  $a_w \neq b_w$ , by the AM–GM inequality,  $\frac{a_w}{b_w} + \frac{b_w}{a_w} \geq 2$ , thus obtaining the contradiction  $a_z + b_z > a_z + b_z$ .

(ii) Suppose that  $a_z = b_z$ . Then,  $Q_{x,y}$  trivially holds. Consider the generic  $P_{z,w}$  for  $\{w, w'\} = \{x, y\}$ . We have shown that  $P_{z,w} \iff [(a_z b_w - b_z a_w)(a_{w'} - b_{w'}) \geq 0]$ . By assumption, we have  $a_z = b_z$ , therefore  $P_{z,w} \iff [a_z(b_w - a_w)(a_{w'} - b_{w'}) \geq 0]$ . Observe that if  $b_w > a_w$  it must hold that  $b_{w'} < a_{w'}$  (resp., if  $b_w < a_w$  then  $b_{w'} > a_{w'}$ ). Thus  $a_z(b_w - a_w)(a_{w'} - b_{w'}) \geq 0$  and  $P_{z,w}$  holds.  $\square$

### C.3 Proof of Lemma 10

*Proof.* We proceed by contradiction. Assume that there exist two distinct 2-MNLs  $((a'_i, a'_j, a'_k), (b'_i, b'_j, b'_k)) \neq ((a''_i, a''_j, a''_k), (b''_i, b''_j, b''_k))$  that are both consistent with the functions in  $\mathcal{D}$ . We show that they will be “flipped”, i.e.,  $((a'_i, a'_j, a'_k), (b'_i, b'_j, b'_k)) = ((b''_i, b''_j, b''_k), (a''_i, a''_j, a''_k))$ .

By assumptions we have that  $a'_j \neq b'_j$ ,  $a'_k \neq b'_k$ ,  $a''_j \neq b''_j$  and  $a''_k \neq b''_k$ . Moreover, by Lemma 9, we have that  $a'_i = b'_i = a''_i = b''_i = D_{\{i,j,k\}}(i) \triangleq x$ .

Each of the two sets of weights must give the same probability to the event  $i$  wins in the slate  $\{i, j\}$ , i.e.,

$$\frac{1}{2} \cdot \frac{a'_i}{a'_i + a'_j} + \frac{1}{2} \cdot \frac{b'_i}{b'_i + b'_j} = D_{\{i,j\}}(i) = \frac{1}{2} \cdot \frac{a''_i}{a''_i + a''_j} + \frac{1}{2} \cdot \frac{b''_i}{b''_i + b''_j}.$$

Using the definition of  $x$ , this yields the cubic equation

$$(a'_j + b'_j - a''_j - b''_j)x^3 + 2(a'_j b'_j - a''_j b''_j)x^2 + (a'_j a''_j b'_j + a'_j b'_j b''_j - a'_j a''_j b''_j - a''_j b'_j b''_j)x = 0. \quad (4)$$

Now since  $\frac{1}{2}(a'_j + b'_j) = D_{\{i,j,k\}}(j) = \frac{1}{2}(a''_j + b''_j)$ , we have that  $a'_j + b'_j - a''_j - b''_j = 0$ ; we can thus drop the highest-degree term of (4). Moreover, by our boundary conditions, we can assume  $0 < D_{\{i,j,k\}}(i) = x < 1$  and thus we can drop the  $x = 0$  solution as well. After these, (4) becomes

$$2(a'_j b'_j - a''_j b''_j) \cdot x + a'_j b'_j (a''_j + b''_j) - a''_j b''_j (a'_j + b'_j) = 0. \quad (5)$$

Once again we use  $a'_j + b'_j = a''_j + b''_j = 2D_{\{i,j,k\}}(j)$  to simplify (5) to

$$(a'_j b'_j - a''_j b''_j) \cdot x + (a'_j b'_j - a''_j b''_j) D_{\{i,j,k\}}(j) = 0. \quad (6)$$

Now, for (6) to be satisfied, we must either have  $x = -D_{\{i,j,k\}}(j) < 0$  or  $a'_j b'_j = a''_j b''_j$ . The former is impossible since  $x = a'_i > 0$ . Therefore we consider the latter, i.e.,  $a'_j = \frac{a''_j b''_j}{b'_j}$  and apply  $a'_j + b'_j = a''_j + b''_j$  again to (6), to get

$$a''_j \cdot \frac{b''_j - b'_j}{b'_j} = b''_j - b'_j. \quad (7)$$

Examining (7), if  $b''_j = b'_j$ , it must also hold  $a''_j = a'_j$ . However, since  $a'_i = b'_i = a''_i = b''_i$ , it must also be that  $a'_k = a''_k$  and  $b'_k = b''_k$ , i.e., we get the desired contradiction  $((a'_i, a'_j, a'_k), (b'_i, b'_j, b'_k)) = ((a''_i, a''_j, a''_k), (b''_i, b''_j, b''_k))$ . On the other hand, if  $b''_j \neq b'_j$ , we can divide (7) by  $b''_j - b'_j$  to get  $a''_j = b'_j$ . This implies, by  $a'_j + b'_j = a''_j + b''_j$ , that  $a'_j = b''_j$ . But, if  $a'_i + a''_j = x + a''_j = x + b'_j = b'_i + b'_j$ , it must be that  $a''_k = b'_k$ . Therefore, if  $((a'_i, a'_j, a'_k), (b'_i, b'_j, b'_k)) \neq ((a''_i, a''_j, a''_k), (b''_i, b''_j, b''_k))$ , it must hold that  $((a'_i, a'_j, a'_k), (b'_i, b'_j, b'_k)) = ((b''_i, b''_j, b''_k), (a''_i, a''_j, a''_k))$ , which is again a contradiction.  $\square$

## C.4 Proof of Theorem 13

*Proof.* The assumptions on  $\mathcal{D}$  guarantee, wlog, that in any (properly reordered) pair of weights  $((a_i, a_j, a_k), (b_i, b_j, b_k))$ , it holds  $a_j > b_j, a_k > b_k$ . We now create a system with (1) and (2) of Lemma 11:

$$\begin{cases} a_j &= (1 - a_k) \left( D_{\{i,j\}}(j) + \frac{D_{\{i,j\}}(j) D_{\{i,j,k\}}(i) - D_{\{i,j\}}(i) D_{\{i,j,k\}}(j)}{a_k - D_{\{i,j,k\}}(k)} \right) \\ a_k &= (1 - a_j) \left( D_{\{i,k\}}(k) + \frac{D_{\{i,k\}}(k) D_{\{i,j,k\}}(i) - D_{\{i,k\}}(i) D_{\{i,j,k\}}(k)}{a_j - D_{\{i,j,k\}}(j)} \right). \end{cases} \quad (8)$$

We will show that (8) has a unique solution.

For simplicity of exposition, we rewrite (8) using  $t_j = D_{\{i,j,k\}}(j)$ ,  $t_k = D_{\{i,j,k\}}(k)$ ,  $d_j = D_{\{i,j\}}(j)$ , and  $d_k = D_{\{i,k\}}(k)$  to obtain

$$\begin{cases} 2d_j \cdot a_k b_k + a_j b_k + a_k b_j &= 4d_j t_k - 2d_j + 2t_j \\ 2d_k \cdot a_j b_j + a_j b_k + a_k b_j &= 4d_k t_j - 2d_k + 2t_k, \end{cases}$$

where  $b_j = 2t_j - a_j$  and  $b_k = 2t_k - a_k$ . Now, suppose by contradiction that there exist two distinct solutions  $(a'_j, a'_k)$  and  $(a''_j, a''_k)$ . Then, the following system in the variable  $x$  must have, as solutions,  $x = 0$  and  $x = 1$ :

$$\left\{ \begin{array}{l} 2d_j \cdot (x(a''_k - a'_k) + a'_k)(x(b''_k - b'_k) + b'_k) \\ + (x(a''_j - a'_j) + a'_j)(x(b''_k - b'_k) + b'_k) + (x(a''_k - a'_k) + a'_k)(x(b''_j - b'_j) + b'_j) = 4d_j t_k - 2d_j + 2t_j \\ 2d_k \cdot (x(a''_j - a'_j) + a'_j)(x(b''_j - b'_j) + b'_j) \\ + (x(a''_j - a'_j) + a'_j)(x(b''_k - b'_k) + b'_k) + (x(a''_k - a'_k) + a'_k)(x(b''_j - b'_j) + b'_j) = 4d_k t_j - 2d_k + 2t_k \\ 0 \leq x \leq 1 \end{array} \right.$$

By assumption we know that the system is feasible at  $x = 0$  and at  $x = 1$ . We collect the  $x$ 's:

$$\left\{ \begin{array}{l} x^2 \cdot (2d_j(a''_k - a'_k)(b''_k - b'_k) + (a''_j - a'_j)(b''_k - b'_k) + (a''_k - a'_k)(b''_j - b'_j)) \\ + x \cdot (2d_j a'_k(b''_k - b'_k) + 2d_j(a''_k - a'_k)b'_k + (b''_k - b'_k)a'_j + (a''_j - a'_j)b'_k + (a''_k - a'_k)b'_j + (b''_j - b'_j)a'_k) \\ - (4d_j t_k - 2d_j + 2t_j) = 0 \\ x^2 \cdot (2d_k(a''_j - a'_j)(b''_j - b'_j) + (a''_k - a'_k)(b''_j - b'_j) + (a''_j - a'_j)(b''_k - b'_k)) \\ + x \cdot (2d_k a'_j(b''_j - b'_j) + 2d_k(a''_j - a'_j)b'_j + (b''_j - b'_j)a'_k + (a''_k - a'_k)b'_j + (a''_j - a'_j)b'_k + (b''_k - b'_k)a'_j) \\ - (4d_k t_j - 2d_k + 2t_k) = 0 \\ 0 \leq x \leq 1 \end{array} \right.$$

Both the quadratics need to have  $\{0, 1\}$  as their set of solutions. Therefore, the two quadratics have to have their axis of symmetry at  $x = \frac{1}{2}$ . In other words, the derivatives of the two quadratics have to evaluate to 0 at  $x = \frac{1}{2}$ . We take the derivatives of the two quadratics, to get two linear equations:

$$\left\{ \begin{array}{l} 2x \cdot (2d_j(a''_k - a'_k)(b''_k - b'_k) + (a''_j - a'_j)(b''_k - b'_k) + (a''_k - a'_k)(b''_j - b'_j)) \\ + (2d_j a'_k(b''_k - b'_k) + 2d_j(a''_k - a'_k)b'_k + (b''_k - b'_k)a'_j + (a''_j - a'_j)b'_k + (a''_k - a'_k)b'_j + (b''_j - b'_j)a'_k) = 0 \\ 2x \cdot (2d_k(a''_j - a'_j)(b''_j - b'_j) + (a''_k - a'_k)(b''_j - b'_j) + (a''_j - a'_j)(b''_k - b'_k)) \\ + (2d_k a'_j(b''_j - b'_j) + 2d_k(a''_j - a'_j)b'_j + (b''_j - b'_j)a'_k + (a''_k - a'_k)b'_j + (a''_j - a'_j)b'_k + (b''_k - b'_k)a'_j) = 0. \end{array} \right.$$

Since the axes of symmetry of the two quadratics were both at  $x = \frac{1}{2}$ , substituting  $\frac{1}{2}$  for  $x$  in the two derivatives should guarantee feasibility:

$$\left\{ \begin{array}{l} (2d_j(a''_k - a'_k)(b''_k - b'_k) + (a''_j - a'_j)(b''_k - b'_k) + (a''_k - a'_k)(b''_j - b'_j)) \\ + (2d_j a'_k(b''_k - b'_k) + 2d_j(a''_k - a'_k)b'_k + (b''_k - b'_k)a'_j + (a''_j - a'_j)b'_k + (a''_k - a'_k)b'_j + (b''_j - b'_j)a'_k) = 0 \\ (2d_k(a''_j - a'_j)(b''_j - b'_j) + (a''_k - a'_k)(b''_j - b'_j) + (a''_j - a'_j)(b''_k - b'_k)) \\ + (2d_k a'_j(b''_j - b'_j) + 2d_k(a''_j - a'_j)b'_j + (b''_j - b'_j)a'_k + (a''_k - a'_k)b'_j + (a''_j - a'_j)b'_k + (b''_k - b'_k)a'_j) = 0. \end{array} \right.$$

Simplifying, we get

$$\left\{ \begin{array}{l} 2d_j(a''_k b''_k - a'_k b'_k) = a'_j b'_k + a'_k b'_j - a''_j b''_k - a''_k b''_j \\ 2d_k(a''_j b''_j - a'_j b'_j) = a'_j b'_k + a'_k b'_j - a''_j b''_k - a''_k b''_j, \end{array} \right.$$

and thus:

$$\left\{ \begin{array}{l} d_j = \frac{\frac{1}{2} a'_j b'_k + a'_k b'_j - a''_j b''_k - a''_k b''_j}{a''_k b''_k - a'_k b'_k} \\ d_k = \frac{\frac{1}{2} a'_j b'_k + a'_k b'_j - a''_j b''_k - a''_k b''_j}{a''_j b''_j - a'_j b'_j}. \end{array} \right.$$

Observe that the numerators on the RHSs are equal to  $y = a'_j b'_k + a'_k b'_j - a''_j b''_k - a''_k b''_j$ . Let us consider the two denominators of the RHSs:  $a''_k b''_k - a'_k b'_k$  and  $a''_j b''_j - a'_j b'_j$ . We will use a form of the well-known geometric principle that relates the areas of rectangles with the same perimeter. (In other words, we are going to apply a simple form of the AM-GM inequality.)

**Lemma C.1.** *For  $x', y', x'', y'' \geq 0$ , if  $x' + y' = x'' + y''$  and  $|x'' - y''| > |x' - y'|$ , then  $x'y' > x''y''$ .*

*Proof.* Observe that  $xy = ((x+y)^2 - (x-y)^2)/4$  and  $x'y' = ((x'+y')^2 - (x'-y')^2)/4 = ((x+y)^2 - (x'-y')^2)/4$ . Thus,

$$xy - x'y' = \frac{(x'-y')^2 - (x-y)^2}{4} = \frac{|x'-y'|^2 - |x-y|^2}{4} > 0. \quad \square$$

Recall that, we have  $a'_j + b'_j = a''_j + b''_j$  and  $a'_k + b'_k = a''_k + b''_k$ . By the assumptions and by Corollary 12, we can assume that one of the following two alternatives holds:

- If  $a'_j > a''_j > b'_j > b''_j$  and  $a''_k > a'_k > b'_k > b''_k$ , then by Lemma C.1, we must have  $a''_j b''_j - a'_j b'_j > 0$ , and  $a'_k b'_k - a''_k b''_k > 0$ . Thus, if the numerator  $y$  is positive then  $d_j < 0$ , if  $y$  is negative, then  $d_k < 0$ , and if  $y = 0$  then  $d_j = d_k = 0$ . Since both  $d_j$  and  $d_k$  have to be positive, we have reached a contradiction.
- If  $a''_j > a'_j > b'_j > b''_j$  and  $a'_k > a''_k > b'_k > b''_k$ , then  $a'_j b'_j - a''_j b''_j > 0$  and  $a''_k b''_k - a'_k b'_k > 0$ . Thus, if  $y > 0$  then  $d_k < 0$ , if  $y < 0$  then  $d_j < 0$ , and if  $y = 0$  then  $d_j = d_k = 0$ , again, a contradiction.

Hence, two distinct solutions  $((a'_i, a'_j, a'_k), (b'_i, b'_j, b'_k)) \neq ((a''_i, a''_j, a''_k), (b''_i, b''_j, b''_k))$  cannot exist.  $\square$
